# Rare protein-altering variants in *ANGPTL7* lower intraocular pressure and protect against glaucoma

Yosuke Tanigawa<sup>1</sup>, Michael Wainberg<sup>1</sup>, Juha Karjalainen<sup>2,3,4</sup>, Tuomo Kiiskinen<sup>4</sup>,  
Susanna Lemmelä<sup>4</sup>, Joni A. Turunen<sup>5,6</sup>, Aarno Palotie<sup>2,4</sup>, FinnGen,  
Mark J. Daly<sup>2,3,4+</sup> and Manuel A. Rivas<sup>1+</sup>

1. Department of Biomedical Data Science, School of Medicine, Stanford University, Stanford, CA, USA.

2. Program in Medical and Population Genetics and Stanley Center for Psychiatric Research, Broad Institute of Harvard and MIT,  
Cambridge, MA, USA.

3. Analytic and Translational Genetics Unit, Massachusetts General Hospital, Boston, MA, USA.

4. Institute for Molecular Medicine Finland (FIMM), University of Helsinki, Helsinki, Finland.

5. Department of Ophthalmology, University of Helsinki and Helsinki University Hospital, Helsinki, Finland

6. Folkhälsan Research Center, Biomedicum Helsinki, Helsinki, Finland

+Corresponding authors, contributed equally to the work

**Protein-altering variants that are protective against human disease provide *in vivo* validation of therapeutic targets. Here we use genotyping data in UK Biobank and FinnGen to conduct a search for protein-altering variants conferring lower intraocular pressure (IOP) and protection against glaucoma. Through protein-altering variant association analysis we find a missense variant in UK Biobank (rs28991009 (MAF=0.8%) genotyped in 81,527 individuals with measured IOP and an independent set of 4,269 glaucoma patients and 251,355 controls) that significantly lowers IOP ( $\beta = -0.73$  mmHg for heterozygotes,  $-2.96$  mmHg for homozygotes,  $P = 1 \times 10^{-13}$ ) and is associated with 34% reduced risk of glaucoma ( $P = 0.005$ ). In FinnGen, we identify an *ANGPTL7* missense variant at a greater than 50-fold increased frequency in Finland compared with other populations (rs147660927, p.Arg220Cys, MAF Finland = 4.1%), which was genotyped in 5,177 glaucoma patients and 130,461 controls and is associated with 30% lower glaucoma risk ( $P = 1 \times 10^{-9}$ ). We further find three rarer variants in UK Biobank, including a protein-truncating variant, which confer a strong composite lowering of IOP ( $P = 0.002$ ), suggesting the protective mechanism likely resides in the loss of an interaction or function. Our results support inhibition or down-regulation of *ANGPTL7* as a therapeutic strategy for glaucoma.**

## Introduction

Intraocular pressure is currently the sole modifiable risk factor and predictive measure for glaucoma<sup>1,2,3,4</sup> (**Supplementary Figure S1**). Genome-wide association studies (GWAS) have commonly used genetic associations to this endophenotype that exhibits high genetic correlation ( $r_g = 0.71$ ) to glaucoma, as an approach to prioritize genetic variants likely to contribute to disease risk<sup>5</sup>. A total of 53 independent loci have been unequivocally implicated in glaucoma<sup>5</sup>. For these discoveries, like most GWAS results, it has proven challenging to infer the functional consequences of common variant associations beyond cases where protein-altering variants have been directly implicated. Protein-altering variants, generally the strongest-acting genetic variants in medical genetics, include nonsynonymous substitutions and protein-truncating variants, and understanding their functional consequences provides insight into the therapeutic effects of inhibiting or down-regulating the gene in which they reside<sup>6</sup>. Thus, identifying protein-altering variants that confer protection from disease holds particular promise for identifying therapeutic targets.

Here we leverage two population biobanks that provide complementarity for glaucoma gene discovery. First, UK Biobank has obtained intraocular pressure (IOP) measurements in approximately 128,000 individuals in addition to case-control status for glaucoma from hospital in-patient and verbal questionnaire data in over 500,000 individuals<sup>7,8</sup>. Second, FinnGen has directly genotyped and aggregated disease outcomes in over 135,000 individuals from Finland, an isolated population with recent bottlenecks that offers an unprecedented advantage for studying rare variants in complex diseases<sup>9</sup>. With clinic-based recruitment focused on several areas including ophthalmology, and with 32.4% of the collection above age 70, FinnGen is particularly well-powered for aging-associated endpoints. We therefore conduct targeted association analysis with IOP in UK Biobank (N = 81,534) to identify protein-altering variants that reduce IOP, and test whether those variants, or others in the same genes, also confer protection to glaucoma in FinnGen (5,177 cases and 130,461 controls) and UK Biobank (4,269 cases and 251,355 controls not included in the IOP sample). Analysis of an allelic series of protein-altering variants in *ANGPTL7* in 9,446 glaucoma patients and over 350,000 controls identifies a significant lowering effect on IOP and protective association with glaucoma. By analyzing putative loss-of-function variants, we find concordant effect directions with the nonsynonymous substitutions, suggesting that the protective mechanism may reside in the loss of gene function.

## Results

Protein-altering variant association analysis

We conducted protein-altering variant association analysis with IOP, as measured via Goldmann-correlated tonometry, in 81,527 British individuals in UK Biobank dataset (Methods)<sup>10</sup>. Across 41,632 rare (0.01 % < MAF < 1%) protein-altering variants outside of the MHC region with genotyping array data in UK Biobank, we used a generalized linear model implemented in PLINK<sup>11</sup> to scan for variants with IOP-lowering effects. We identified one protein-altering variant significantly associated with lower IOP below a Bonferroni-corrected  $P$  value <  $1.0 \times 10^{-6}$ , a nonsynonymous substitution (p.Gln175His) in *ANGPTL7* ( $P = 1.47 \times 10^{-13}$ ,  $\beta = -0.200$  SD 95% CI: [-0.253, -0.147], -0.73 mmHg for heterozygotes, -2.96 mmHg for homozygotes, **Table 1,2, Supplementary Figures S2**).

Based on this finding, we assessed whether any additional rare variant associations in *ANGPTL7* were present. We found three additional independent rare protein-altering variants in *ANGPTL7* (MAF < 0.25%) including a premature stop-gain allele (p.Arg177Ter). Collectively, these three variants showed a marginally significant association with lower IOP ( $P = 0.0023$ , **Table 1**), with the stop-gain allele p.Arg177Ter also showing a marginally significant effect on its own ( $P = 0.038$ ). Genotyping intensity plots and the concordance of genotype calls from array and whole-exome sequencing data were manually inspected to ensure high quality and consistent genotyping (**Supplementary Figures S3, Supplementary Table S1, Methods**) and alleles were confirmed to be independent (pairwise  $r^2 < 10^{-4}$  for each, **Supplementary Table S2, Methods**). Using inverse variance method, the combined effect of those four variants are estimated to be -0.19 [95% CI: -0.23 - -0.14] SD,  $P = 3.4 \times 10^{-16}$ ; -0.67 mmHg [95% CI: -0.85 - -0.49], **Supplementary Figures S4, Supplementary Table S3-4, Methods**).

Given these findings, we next asked whether any of these putative IOP-lowering genetic variants showed effects consistent with reducing glaucoma risk in an independent set of British individuals that do not have IOP measures (4,269 cases and 251,355 controls). For p.Gln175His in *ANGPTL7*, we estimated that the variant lowers glaucoma risk by 34% ( $P = 0.00543$ ; OR = 0.66 [95% CI: 0.366 - 0.954]). The three additional protein-altering variants did not significantly confer protection against glaucoma (burden test  $P = 0.55$ ), although we expect this to be a result of limited power in the binary case-control setting.

| Variant        | rsID        | HGVSp       | MAF    | Beta SD [95% CI]   | $P$                   |
|----------------|-------------|-------------|--------|--------------------|-----------------------|
| 1:11252357:A:G | rs200058074 | p.Gln136Arg | .054 % | -.038 [-.26, .18]  | $7.3 \times 10^{-1}$  |
| 1:11252369:G:A | rs28991002  | p.Arg140His | .25 %  | -.16 [-.25, -.061] | $1.3 \times 10^{-3}$  |
| 1:11253684:G:T | rs28991009  | p.Gln175His | .81 %  | -.20 [-.25, -.15]  | $1.4 \times 10^{-13}$ |
| 1:11253688:C:T | rs143435072 | p.Arg177Ter | .041 % | -.26 [-.51, -.014] | $3.8 \times 10^{-2}$  |

**Table 1. *ANGPTL7* IOP protein-altering variant association in UK Biobank.** Variant includes chromosome, position, reference, and alternate allele (hg19). rsID - the rs identifier of the genetic variant. HGVSp - the HGVS

protein sequence name. MAF - the minor allele frequency in UK Biobank British population. Beta - estimated regression coefficient with 95% confidence intervals. *P* - p-value of association.

| Variant   | Dosage  | rsID        | Carrier frequency in UK | Carrier frequency in Finland | N with IOP (UK Biobank) | IOP (mmHg) [95% CI]      | OR for glaucoma |
|-----------|---------|-------------|-------------------------|------------------------------|-------------------------|--------------------------|-----------------|
| Gln175His | Gln/His | rs28991009  | 1.43%                   | 0.24%                        | 1355                    | -0.73 [-0.95, -0.52] *** | 0.66**          |
| Gln175His | His/His |             | 0.01%                   | NA                           | 5                       | -2.95 [-6.43, 0.530] .   | NS              |
| Arg177Ter | Arg/Ter | rs143435072 | 0.07%                   | NA                           | 62                      | -0.94 [-1.93, 0.0445] .  | NS              |
| Arg140His | Arg/His | rs28991002  | 0.51%                   | 0.35%                        | 427                     | -0.48 [-0.86, -0.10] *   | NS              |
| Gln136Arg | Gln/Arg | rs200058074 | 0.11%                   | NA                           | 80                      | -0.21 [-1.08, 0.66]      | NS              |
| Arg220Cys | Arg/Cys | rs147660927 | NA                      | 7.82%                        | NA                      | NA                       | 0.72***         |
| Arg220Cys | Cys/Cys |             | NA                      | 0.21%                        | NA                      | NA                       | 0.47 .          |

Significant codes: 0 '\*\*\*' 0.001 '\*\*' 0.01 '\*' 0.05 '.' 0.1 ' ' 1

100 **Table 2. *ANGPTL7* allelic series summary.** Variant: HGVS amino acid nomenclature. Dosage - genotype of individuals. rsID - rs identifier. Carrier frequency in UK - carrier frequency in UK Biobank for the respective genotype dosage. Carrier frequency in Finland - carrier frequency in FinnGen for the respective genotype dosage. N with IOP (UK Biobank) - number of individuals in UK Biobank with intraocular pressure measurements corresponding to the genotype dosage. IOP (mmHg) [95% CI] - unstandardized estimates of effect size on intraocular pressure measurements (NB: standardized estimated effect sizes may have lower p-values due to normalization procedure).  
 105 OR for glaucoma - estimate odds ratio on glaucoma risk for the respective genotype dosage. NS non-significant (*p* > 0.1).

## Independent Finnish-enriched missense allele in *ANGPTL7*

We then sought evidence from the FinnGen dataset that either the same or novel  
 Finnish-enriched protein-altering variants would confirm the association of *ANGPTL7* with  
 110 protection from glaucoma. This additional *ANGPTL7* association data, obtained in 5,177  
 glaucoma patients and 130,461 controls, provided strong support that protein-altering variants in  
*ANGPTL7* protect against glaucoma (case definitions described in [Supplementary Table S5](#)).  
 Specifically, we found that the p.Gln175His substitution has nominal evidence of association (*P*  
 = 0.031, OR = 0.49) despite the variant only being present at a minor allele frequency of 0.1% in  
 115 this Finnish cohort (8-fold depleted compared to UK Biobank). The remaining protein-altering

120 variants in *ANGPTL7* tested in UK Biobank were not found in the FinnGen dataset. Confirmation of an *ANGPTL7* effect on glaucoma risk was seen in data from an independent Finnish-specific protein-altering nonsynonymous substitution, p.Arg220Cys, which was strongly associated with protection from glaucoma ( $P = 1.0 \times 10^{-9}$ , OR = 0.72 [95% CI: 0.64 - 0.81], **Supplementary Figure S5**). Of note, this observation is advantaged by the property that p.Arg220Cys is found at a greater than 50-fold increased frequency in Finland compared with other populations<sup>12</sup>, reinforcing the value of isolated, bottlenecked populations in which the allele frequency spectrum is intensely concentrated on the minority of variants passing through the bottleneck.

125 While registry-based diagnoses in FinnGen do not yet contain detailed ophthalmologic records, a subset of 2695 glaucoma patients had been recorded as having primary open-angle glaucoma (POAG). In this sub-group a stronger effect was observed (OR=0.68) versus those glaucoma cases without a definitive record of POAG (OR=0.77), reminiscent of the stronger risk effects seen at the myocilin (*MYOC*) gene and other established genes in the POAG subgroup. Given the Finnish enrichment of the known strong glaucoma risk allele, p.Gln368Ter, in *MYOC* (MAF in Finland = 0.3%, MAF in Non-Finnish European = 0.16%, reference sequence: NM\_00026), we next asked whether carriers have risk reduced if they carry *ANGPTL7* p.Arg220Cys. In FinnGen, we estimate that 7.7% of individuals carriers for *MYOC* p.Gln368Ter variant are POAG cases in comparison to 2% for non-carriers. In the presence of *ANGPTL7* p.Arg220Cys, only 1.3% of individuals are POAG cases, and only 1 of 70 (1.4%) who carry both *MYOC* risk and *ANGPTL7* protective variants were POAG cases (**Supplementary Table S6**). This suggests *ANGPTL7* protection extends to the *MYOC* risk group but the small counts preclude any definitive statement regarding interaction - given the limited number of double-carriers, larger case-control series are needed to refine our understanding as to whether *ANGPTL7* p.Arg220Cys variant modifies the glaucoma risk conferred by p.Gln368Ter in *MYOC*.

140 Access to genotype data in over 300,000 individuals from the UK and 135,000 from the Finnish group enabled us to identify rare protein-altering homozygotes. In UK Biobank we found 28 individuals homozygous for the 175His allele, consistent with Hardy-Weinberg expectation ( $n=22.6$ ), where we estimated a 2.96 mm Hg drop in IOP compared to the mean IOP levels. Furthermore, the oldest reached the age of 80 and one of the 28 died (age 65). In FinnGen we found 268 individuals homozygous for the 220Cys allele, the oldest reached the age of 98, with no depletion of homozygotes compared with Hardy-Weinberg equilibrium expectation. There was no significant association of the homozygous genotype with a decreased lifespan. Together this indicates that having two copies with 175His or 220Cys in *ANGPTL7* is compatible with normal lifespan. To assess the potential impacts of those protein-truncating variants on reproductive fitness we assessed the association of p.Gln175His with the number of live births and number of children fathered and found no significant association ( $P > 0.05/4$ , **Supplementary Table S7**). Hence, we did not find any severe medical consequences that would be of obvious concern in developing a therapeutic to mimic the effect of these alleles.

155 The combined significance of *ANGPTL7* protein-altering variants across more than 435,000 samples tested is  $P = 3.4 \times 10^{-16}$  for IOP and  $P = 1.9 \times 10^{-11}$  for glaucoma using inverse-variance weighted method (**Supplementary Figure S6**).

## Transcript and protein expression

*ANGPTL7*, a five-exon protein-coding gene, encodes the Angiotensin-related protein 7, which is expressed in several human tissues including the trabecular meshwork, cornea and retina<sup>13–15</sup>.  
160 Recently, *ANGPTL7* overexpression in primary human trabecular meshwork cells was found to alter the expression of relevant trabecular meshwork proteins of the extracellular matrix, including fibronectin, collagens type I, IV, and V, myocilin, versican, and MMP1, and *ANGPTL7* protein was increased as the disease progressed in POAG beagle dogs<sup>13</sup>. We examined proteomics expression data in normal tissues and cell lines from ProteomicsDB and MOPED<sup>16,17</sup>  
165 and found vitreous humor tissue-specific expression of *ANGPTL7* ( $\log_{10}$  ppm = 1, **Supplementary Figure S7**). These data suggest that the eye is the relevant tissue type in understanding the functional consequences of the variants discovered in this study. Further work is dissecting the role of *ANGPTL7* in all possible cell types in the eye is warranted.

## Discussion

170 This study establishes strong genetic evidence for the involvement of *ANGPTL7* in glaucoma risk in which a powerful allelic series, including all low-frequency nonsynonymous substitutions and a single premature stop-gain substitution, is conclusively associated with reduced disease risk and endophenotype-lowering effects. Increasing evidence is associating *ANGPTL* proteins to cardiometabolic phenotypes<sup>18–22</sup>. Although it has been recently proposed that *ANGPTL7* levels are increased in obesity and reduced after physical exercise, we do not observe any  
175 evidence of genetic association in either UK Biobank or FinnGen to support this hypothesis<sup>23</sup>. In the context of the other established variants in glaucoma, including the protein-truncating variants in *MYOC*, p.Gln175His and the 57-fold Finnish enriched p.Arg220Cys variant in *ANGPTL7* exert a comparable protective effect. Because of the strong protective effect  
180 associated with the *ANGPTL7* coding variants, studies of *ANGPTL7* inhibition and the specific action of these variant proteins should be useful in understanding the mechanism by which protection to glaucoma disease occurs and whether this reveals a promising therapeutic opportunity similar to that which has been realized from the examples of *PCSK9*, *APOC3* and cardiovascular disease<sup>24–26</sup>. The phenotype and longevity profile of *ANGPTL7* homozygotes  
185 suggest that this is likely to be a safe strategy for therapeutic intervention.



## Acknowledgments

190 This research has been conducted using the UK Biobank Resource under Application Number 24983, “Generating effective therapeutic hypotheses from genomic and hospital linkage data” (<http://www.ukbiobank.ac.uk/wp-content/uploads/2017/06/24983-Dr-Manuel-Rivas.pdf>). Based on the information provided in Protocol 44532 the Stanford IRB has determined that the research does not involve human subjects as defined in 45 CFR 46.102(f) or 21 CFR 50.3(g). All participants of UK Biobank provided written informed consent (more information is available at <https://www.ukbiobank.ac.uk/2018/02/gdpr/>). For FinnGen, all patients and control subjects provided informed consent, a biobank research consent, based on the Finnish Biobank Act.

195 Recruitment protocols followed the biobank protocols approved by Valvira, the National Supervisory Authority for Welfare and Health. The Ethical Review Board of the Hospital District of Helsinki and Uusimaa approved the FinnGen study protocol Nr HUS/990/2017. All DNA samples and data in this study were pseudonymized. We thank all the participants in the UK Biobank and FinnGen studies. This work was supported by National Human Genome Research Institute (NHGRI) of the National Institutes of Health (NIH) under awards R01HG010140 (M.A.R.). The content is solely the responsibility of the authors and does not necessarily represent the official views of the National Institutes of Health. We thank Fatima Rodriguez and David Amar for invaluable feedback on the manuscript. Y.T. is supported by Funai Overseas

200 School of Medicine. FinnGen is supported by Abbvie, Astra Zeneca, Biogen, Celgene, Genentech, GSK, Merck, Pfizer, and Sanofi. M.A.R. is supported by Stanford University and a National Institute of Health center for Multi- and Trans-ethnic Mapping of Mendelian and Complex Diseases grant (5U01 HG009080).

205

## Author information

210

### Author contributions

M.A.R. and M.J.D. conceived and designed the study. M.A.R., Y.T., and M.J.D. carried out the statistical and computational analyses. M.A.R., Y.T., J.K., T.K., J.A.T., and M.J.D. carried out quality control of the data. The manuscript was written by M.A.R., Y.T., and M.J.D.; and revised by all the co-authors. All co-authors have approved of the final version of the manuscript.

215

### Competing financial interests

None.

## Data availability:

Data is displayed in the Global Biobank Engine (<https://biobankengine.stanford.edu>). Analysis scripts and notebooks are available on GitHub at <https://github.com/rivas-lab/ANGPTL7>.

220

## References

1. Cantor, L. B. Brimonidine in the treatment of glaucoma and ocular hypertension. *Therapeutics and Clinical Risk Management* **2**, 337–346 (2006).
2. Kass, M. A. *et al.* The Ocular Hypertension Treatment Study: a randomized trial determines that topical ocular hypotensive medication delays or prevents the onset of primary open-angle glaucoma. *Arch. Ophthalmol.* **120**, 701–13; discussion 829–30 (2002).
3. Kazemian, P., Lavieri, M. S., Van Oyen, M. P., Andrews, C. & Stein, J. D. Personalized Prediction of Glaucoma Progression Under Different Target Intraocular Pressure Levels Using Filtered Forecasting Methods. *Ophthalmology* **125**, 569–577 (2018).
4. Group, T. J. A. of M. D. in G. (jamdig) C. & The Japanese Archive of Multicentral Database in Glaucoma (JAMDIG) construction group. A novel method to predict visual field progression more accurately, using intraocular pressure measurements in glaucoma patients. *Scientific Reports* **6**, (2016).
5. MacGregor, S. *et al.* Genome-wide association study of intraocular pressure uncovers new pathways to glaucoma. *Nat. Genet.* **50**, 1067–1071 (2018).
6. Leshchiner, E. S. *et al.* Small-molecule inhibitors directly target CARD9 and mimic its protective variant in inflammatory bowel disease. *Proc. Natl. Acad. Sci. U. S. A.* **114**, 11392–11397 (2017).
7. Bycroft, C. *et al.* The UK Biobank resource with deep phenotyping and genomic data.

225

230

235



- Nature* **562**, 203–209 (2018).
- 240 8. DeBoever, C. *et al.* Medical relevance of protein-truncating variants across 337,205 individuals in the UK Biobank study. *Nat. Commun.* **9**, 1612 (2018).
9. Lim, E. T. *et al.* Distribution and medical impact of loss-of-function variants in the Finnish founder population. *PLoS Genet.* **10**, e1004494 (2014).
10. Chan, M. P. Y. *et al.* Associations with Intraocular Pressure in a Large Cohort: Results from  
245 the UK Biobank. *Ophthalmology* **123**, 771–782 (2016).
11. Chang, C. C. *et al.* Second-generation PLINK: rising to the challenge of larger and richer datasets. *Gigascience* **4**, 7 (2015).
12. Lek, M. *et al.* Analysis of protein-coding genetic variation in 60,706 humans. *Nature* **536**, 285–291 (2016).
- 250 13. Comes, N., Buie, L. K. & Borrás, T. Evidence for a role of angiotensin-like 7 (ANGPTL7) in extracellular matrix formation of the human trabecular meshwork: implications for glaucoma. *Genes Cells* **16**, 243–259 (2011).
14. Santulli, G. Angiotensin-like proteins: a comprehensive look. *Front. Endocrinol.* **5**, 4 (2014).
- 255 15. Kuchtey, J. *et al.* Angiotensin-like 7 secretion is induced by glaucoma stimuli and its concentration is elevated in glaucomatous aqueous humor. *Invest. Ophthalmol. Vis. Sci.* **49**, 3438–3448 (2008).
16. Kolker, E. *et al.* MOPED: Model Organism Protein Expression Database. *Nucleic Acids Res.* **40**, D1093–9 (2012).
- 260 17. Schmidt, T. *et al.* ProteomicsDB. *Nucleic Acids Res.* **46**, D1271–D1281 (2018).
18. Musunuru, K. & Kathiresan, S. Cardiovascular endocrinology: Is ANGPTL3 the next PCSK9? *Nat. Rev. Endocrinol.* **13**, 503–504 (2017).

19. Musunuru, K. *et al.* Exome sequencing, ANGPTL3 mutations, and familial combined hypolipidemia. *N. Engl. J. Med.* **363**, 2220–2227 (2010).
- 265 20. Gusarova, V. *et al.* Genetic inactivation of ANGPTL4 improves glucose homeostasis and is associated with reduced risk of diabetes. *Nat. Commun.* **9**, 2252 (2018).
21. Clapham, K. R. *et al.* A null mutation in ANGPTL8 does not associate with either plasma glucose or type 2 diabetes in humans. *BMC Endocr. Disord.* **16**, 7 (2016).
22. Peloso, G. M. *et al.* Association of low-frequency and rare coding-sequence variants with  
270 blood lipids and coronary heart disease in 56,000 whites and blacks. *Am. J. Hum. Genet.* **94**, 223–232 (2014).
23. Abu-Farha, M. *et al.* Plasma and adipose tissue level of angiopoietin-like 7 (ANGPTL7) are increased in obesity and reduced after physical exercise. *PLoS One* **12**, e0173024 (2017).
24. Jørgensen, A. B., Frikke-Schmidt, R., Nordestgaard, B. G. & Tybjaerg-Hansen, A.  
275 Loss-of-function mutations in APOC3 and risk of ischemic vascular disease. *N. Engl. J. Med.* **371**, 32–41 (2014).
25. TG and HDL Working Group of the Exome Sequencing Project, National Heart, Lung, and Blood Institute *et al.* Loss-of-function mutations in APOC3, triglycerides, and coronary disease. *N. Engl. J. Med.* **371**, 22–31 (2014).
- 280 26. Cohen, J. C., Boerwinkle, E., Mosley, T. H., Jr & Hobbs, H. H. Sequence variations in PCSK9, low LDL, and protection against coronary heart disease. *N. Engl. J. Med.* **354**, 1264–1272 (2006).
27. Tanigawa, Y. *et al.* Components of genetic associations across 2,138 phenotypes in the UK Biobank highlight novel adipocyte biology. *bioRxiv* 442715 (2019). doi:10.1101/442715
- 285 28. McCarthy, M. & O'Brien, E. McCarthy Group Front page. *McCarthy Group* (2018). Available at: <http://mccarthy.well.ox.ac.uk/>. (Accessed: 20th May 2019)

29. Van Hout, C. V. *et al.* Whole exome sequencing and characterization of coding variation in 49,960 individuals in the UK Biobank. *bioRxiv* 572347 (2019). doi:10.1101/572347

## Methods

290

### Genome-wide association analysis in UK Biobank

295

300

For British individuals ( $n = 337,151$ ) in UK Biobank as described elsewhere<sup>8</sup>, we applied genome-wide association analysis for directly genotyped variants were applied to Goldmann-correlated intraocular pressure described more detailed earlier<sup>10</sup> (right, UK Biobank Field ID 5255, Global Biobank Engine phenotype ID: INI5255) and glaucoma (Global Biobank Engine phenotype ID: HC276, which is previously defined as a part of “high confidence” disease outcome phenotypes by combining disease diagnoses from the UK National Health Service Hospital Episode Statistics with self-reported diagnoses questionnaire<sup>8</sup>), using generalized linear model association analysis implemented in PLINK v2.00aLM (2 April 2019) with age, sex, types of genotyping array, and the first 4 genotype principal components as described elsewhere<sup>11,27</sup>.

### Genotyping quality control in UK Biobank

#### Manual inspection of intensity plots

305

For the identified rare ( $0.01\% < \text{MAF} < 1\%$ ) protein-altering variants in *ANGPTL7* (reference sequence: NM\_021146), we generated and inspected intensity plots with McCarthy Group’s ScatterShot using “UKB - All Participants” module<sup>28</sup>.

#### Variant-calling consistency analysis

310

For individuals with whole-exome sequencing data ( $n = 49,960$ ), we extracted the genotype calls of coding variants in *ANGPTL7* using PLINK v2.00aLM (2 April 2019) and compared the consistency between array-genotyped dataset and whole-exome sequencing dataset<sup>11,29</sup>.

### Independence analysis of alleles

#### Pairwise $r^2$ computation within British individuals in UK Biobank

We computed pairwise  $r^2$  for the identified rare protein-altering variants in *ANGPTL7* within British individuals in UK Biobank using PLINK v1.90b6.7 64-bit (2 Dec 2018) with `--ld <variant_ID_1> <variant_ID_1> hwe-midp` subcommand<sup>11</sup>.

315

## Number of individuals with the combination of genotypes in UK Biobank

Using the extracted genotype calls from for the identified rare protein-altering variants in *ANGPTL7* (see Variant-calling consistency analysis section), we counted the number of British individuals by the combination of genotypes. We computed the expected number of individuals under Hardy-Weinberg equilibrium model and the independence assumption:

- 320
- The expected frequencies of REF/REF, REF/ALT, and ALT/ALT carriers are  $(1 - AF)^2$ ,  $2 \times AF(1 - AF)$ , and  $AF^2$ , respectively.
  - The expected genotyping rate is independently estimated by the observed genotyping rate for each variant.
  - The expected frequency of the combination of genotypes is computed under the independent assumption among alleles
- 325

## Combined effect size estimates of rare protein-altering variants

Using the inverse-variance method for fixed-effects model implemented in R meta package, we performed a meta-analysis of the estimated effect sizes (BETAs) of protein-altering variants on intraocular pressure and glaucoma. For glaucoma, the results are reported as odds ratio. 95% confidence intervals are reported for IOP and glaucoma.

330

## Association analysis with reproductive fitness

Using the number of live births (UK Biobank Field ID: 2734, Global Biobank Engine phenotype ID: INI2734) and the number of children fathered (UK Biobank Field ID: 2405, Global Biobank Engine phenotype ID: INI2405), we performed association analysis for the four identified protein-altering variants using R script with age, types of genotyping array, and the first 4 genotype principal components as covariates.

335

## Homozygous carrier analysis

For UK Biobank British individuals, we extracted the genotype calls with PLINK v2.00aLM (2 April 2019) and identified homozygous carrier of 175H allele<sup>11</sup>. We examined the year of birth (UK Biobank Field ID 34) and age at death (UK Biobank Field ID 40007)<sup>7</sup>.

340

## Supplementary Tables and Figures

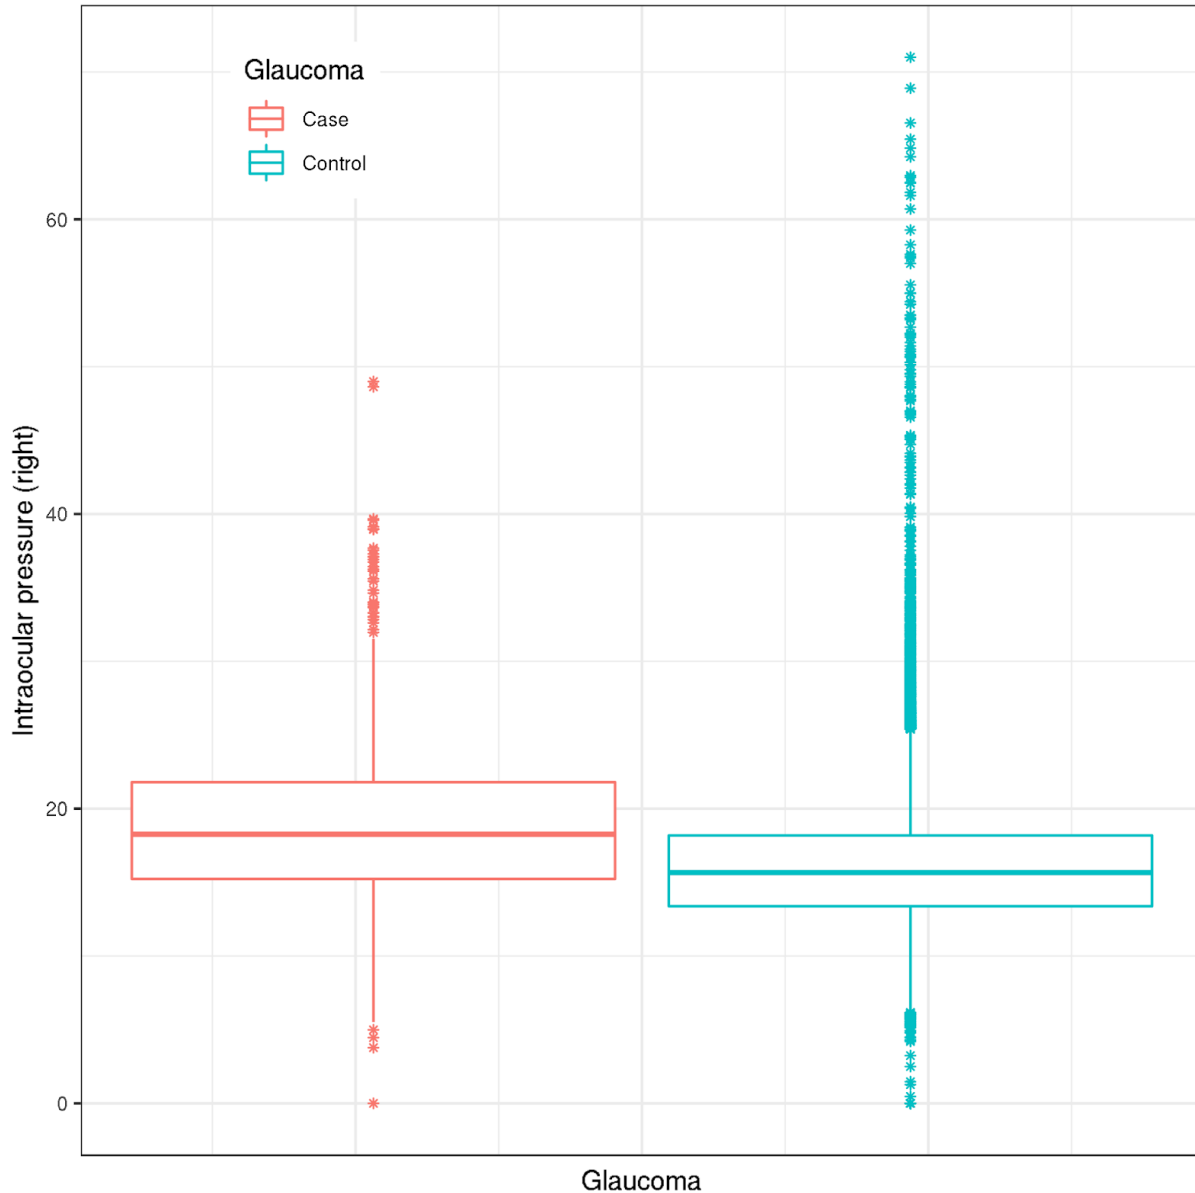

**Supplementary Figure S1.** Phenotype distribution of Intraocular pressure stratified by glaucoma disease status displayed as a Tukey's box plot. The middle bold horizontal line represents the median, the lower and upper hinges show the first and third quartiles, the lower and upper whiskers represent  $1.5 \times$  interquartile range from the hinges. The data points beyond whiskers are plotted individually.

345

350

**Supplementary Table S1.** Consistency of the genotype call for four protein-altering variants in *ANGPTL7* between genotyping array and exome sequencing data. Variant including chromosome, position, reference, and alternate allele (hg19), the rs identifier of the genetic variant (rsID), consequence of the variation (Consequence), genotype call from array (Array) and exome data (Exome), and the number of individuals (N). Inconsistent variant calls are highlighted in bold font.

| Variant        | rsID        | Consequence | Array      | Exome      | N        |
|----------------|-------------|-------------|------------|------------|----------|
| 1:11252357:A:G | rs200058074 | p.Gln136Arg | A/G        | A/G        | 42       |
| 1:11252357:A:G | rs200058074 | p.Gln136Arg | A/A        | A/A        | 49837    |
| 1:11252357:A:G | rs200058074 | p.Gln136Arg | NA         | A/G        | 1        |
| 1:11252357:A:G | rs200058074 | p.Gln136Arg | NA         | A/A        | 29       |
| 1:11252369:G:A | rs28991002  | p.Arg140His | A/A        | A/A        | 1        |
| 1:11252369:G:A | rs28991002  | p.Arg140His | G/A        | G/A        | 218      |
| 1:11252369:G:A | rs28991002  | p.Arg140His | <b>G/A</b> | <b>G/G</b> | <b>1</b> |
| 1:11252369:G:A | rs28991002  | p.Arg140His | G/G        | G/G        | 49,663   |
| 1:11252369:G:A | rs28991002  | p.Arg140His | NA         | G/G        | 26       |
| 1:11253684:G:T | rs28991009  | p.Gln175His | T/T        | T/T        | 4        |
| 1:11253684:G:T | rs28991009  | p.Gln175His | G/T        | G/T        | 720      |
| 1:11253684:G:T | rs28991009  | p.Gln175His | G/G        | G/G        | 49,093   |
| 1:11253684:G:T | rs28991009  | p.Gln175His | NA         | G/T        | 1        |
| 1:11253684:G:T | rs28991009  | p.Gln175His | NA         | G/G        | 91       |
| 1:11253688:C:T | rs143435072 | p.Arg177Ter | C/T        | C/T        | 41       |
| 1:11253688:C:T | rs143435072 | p.Arg177Ter | <b>C/T</b> | <b>C/C</b> | <b>1</b> |
| 1:11253688:C:T | rs143435072 | p.Arg177Ter | C/C        | C/C        | 49,857   |
| 1:11253688:C:T | rs143435072 | p.Arg177Ter | NA         | C/C        | 10       |



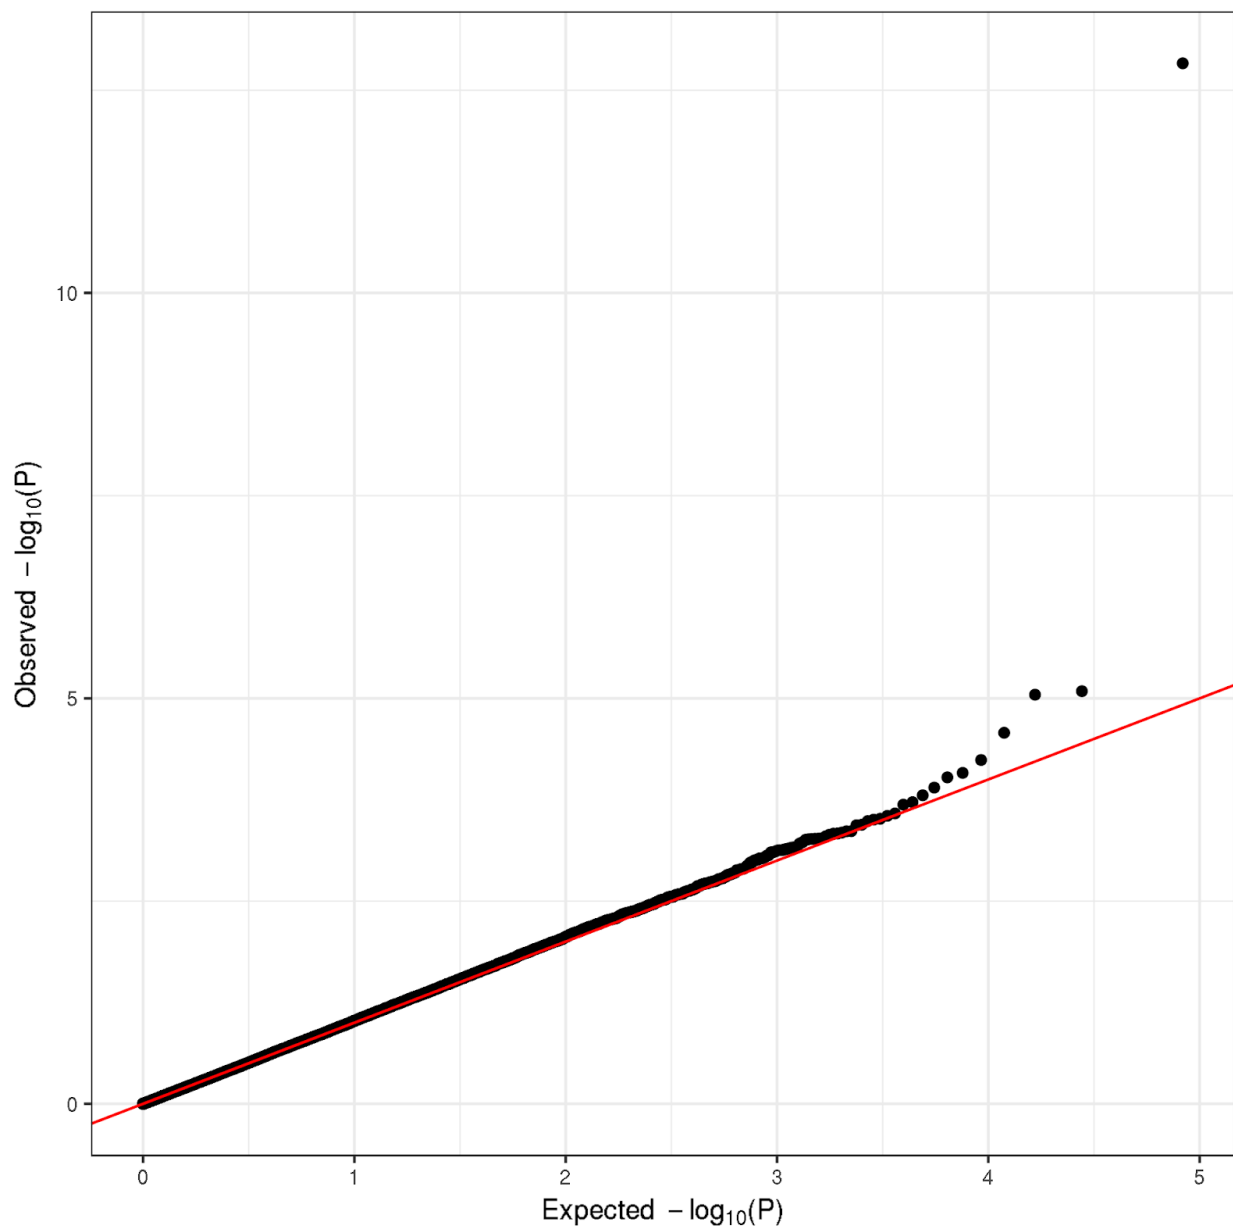

**Supplementary Figure S2.** The protein-altering variant GWAS QQ plot for intraocular pressure. The variants outside of MHC region with 0.01 % < MAF < 1% are included in the analysis.

355 **A**

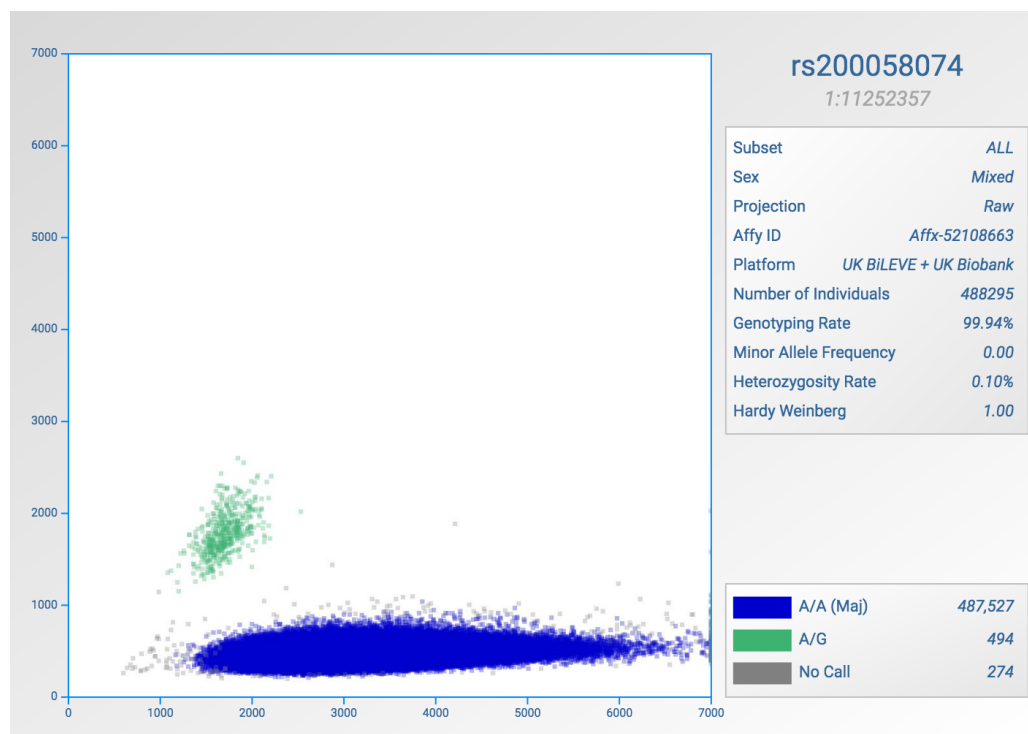

**B**

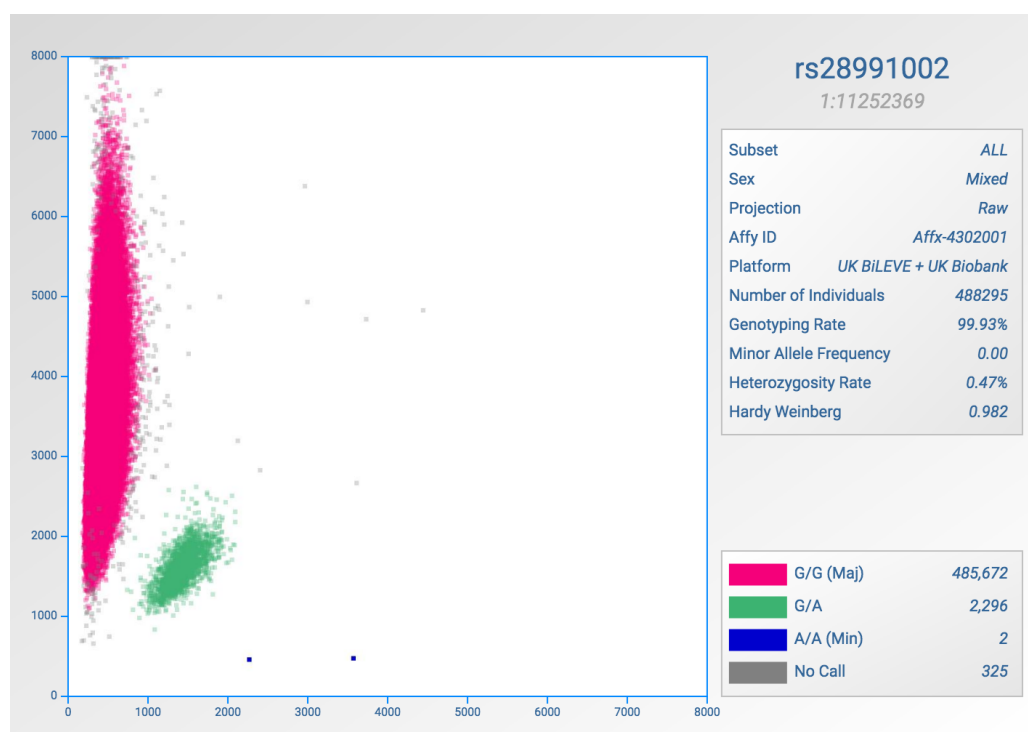

C

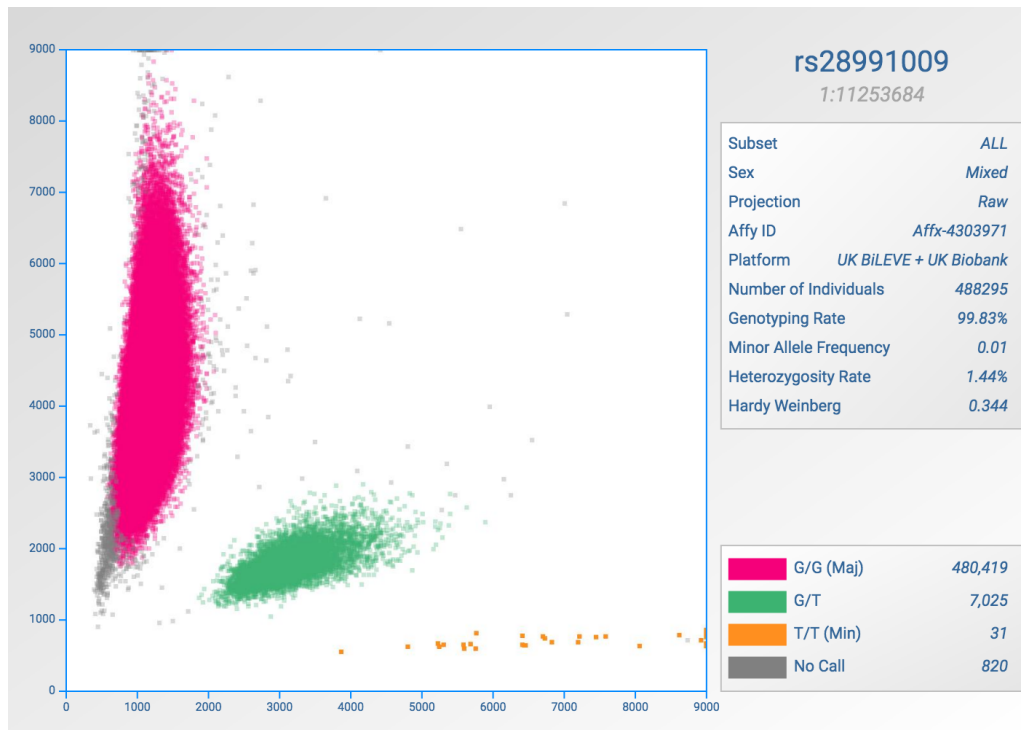

D

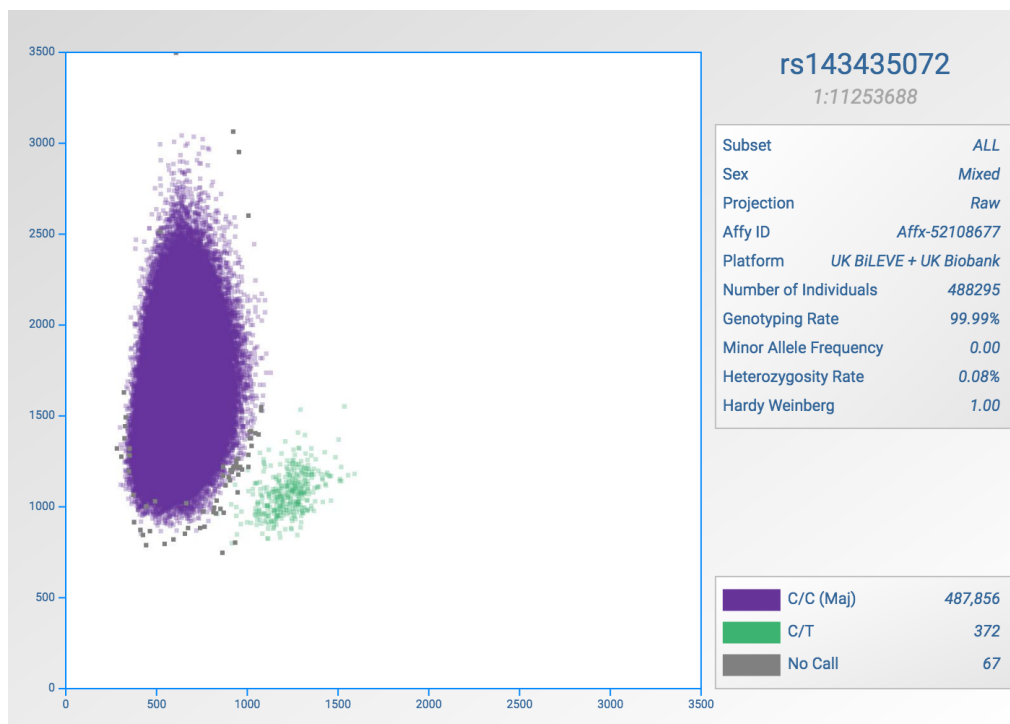

**Supplementary Figure S3.** The intensity plots for *ANGPTL7* protein-altering variants with  $0.01\% < \text{MAF} < 1\%$ . **(A)** rs200058074 (p.Gln136Arg). **(B)** rs28991002 (p.Arg140His). **(C)** rs28991009 (p.Gln175His). **(D)** rs143435072 (p.Arg177Ter)

360

365 **Supplementary Table S2.** Number of individuals stratified by genotype of rare (0.01% < MAF < 1%) protein-altering variants in *ANGPTL7*. The combination of genotypes is shown in the first four columns (rs200058074, rs28991002, rs28991009, and rs143435072) as well as the number of British individuals with the genotype combination in UK Biobank (n\_observed). The expected number of individuals are computed under Hardy-Weinberg equilibrium model and the independence assumption (n\_expected, Method).

| rs200058074 | rs28991002 | rs28991009 | rs143435072 | n_observed | n_expected |
|-------------|------------|------------|-------------|------------|------------|
| A/A         | G/G        | G/G        | C/C         | 328,492.00 | 329,401.21 |
| A/A         | G/G        | G/T        | C/C         | 5,395.00   | 5,390.72   |
| A/A         | G/A        | G/G        | C/C         | 1,693.00   | 1,672.69   |
| A/A         | G/G        | NA         | C/C         | 471.00     | 470.71     |
| A/G         | G/G        | G/G        | C/C         | 356.00     | 353.03     |
| A/A         | G/G        | G/G        | C/T         | 270.00     | 267.80     |
| A/A         | NA         | G/G        | C/C         | 194.00     | 192.47     |
| NA          | G/G        | G/G        | C/C         | 192.00     | 188.77     |
| A/A         | G/G        | G/G        | NA          | 37.00      | 38.13      |
| A/A         | G/G        | T/T        | C/C         | 28.00      | 22.06      |
| A/A         | G/A        | G/T        | C/C         | 8.00       | 27.37      |
| A/G         | G/G        | G/T        | C/C         | 4.00       | 5.78       |
| A/A         | NA         | G/T        | C/C         | 2.00       | 3.15       |
| A/A         | G/A        | G/G        | NA          | 2.00       | 0.19       |
| A/A         | G/G        | NA         | C/T         | 2.00       | 0.38       |
| NA          | G/A        | G/G        | C/C         | 1.00       | 0.96       |
| A/A         | A/A        | G/G        | C/C         | 1.00       | 2.12       |
| A/A         | G/A        | G/G        | C/T         | 1.00       | 1.36       |
| A/A         | G/G        | G/T        | C/T         | 1.00       | 4.38       |
| A/G         | G/G        | NA         | C/C         | 1.00       | 0.50       |

**A**

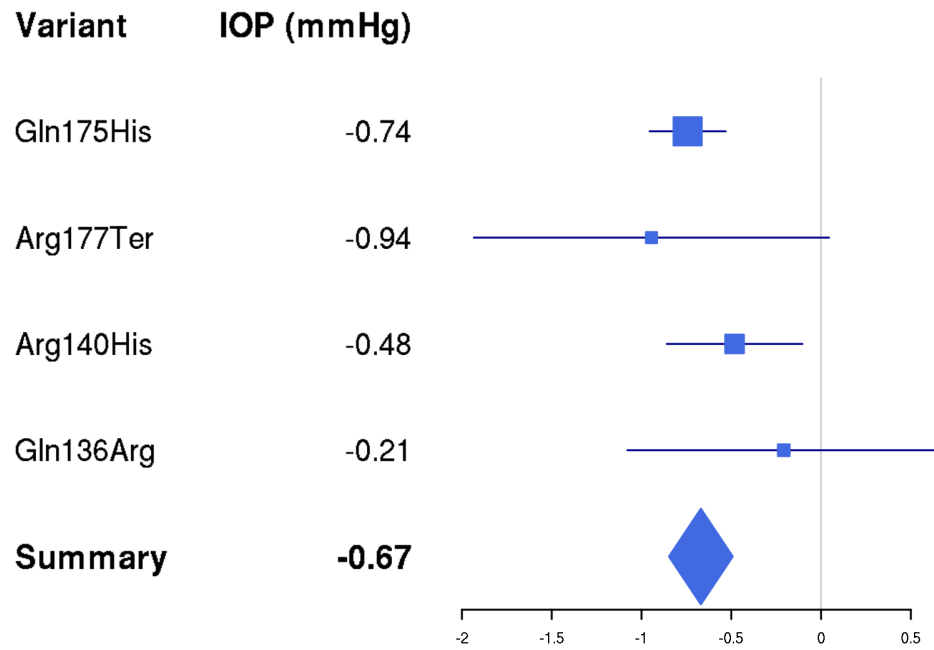

**B**

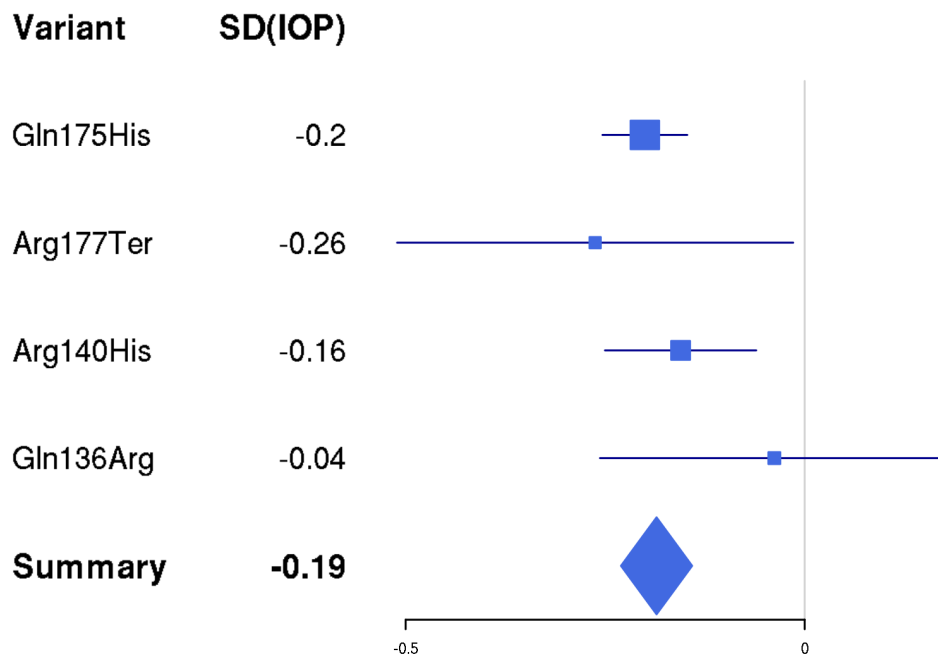

370 **Supplementary Figure S4:** The combined effect size estimates of rare protein-altering variants. The estimates of effect size on unstandardized intraocular pressure measurements (IOP [mmHg]) and normalized intraocular pressure measurements (SD[IOP]) are shown for the four protein-altering variants in *ANGPTL7*. The combined effect size estimate is summarized using inverse-variance method under the fixed effect model (Methods).

375 **Supplementary Table S3.** The combined effect size estimates of rare protein-altering variants. The estimates of effect size on normalized intraocular pressure measurements (SD [IOP]) and their 95% confidence interval (95% CI) are shown for the four protein-altering variants in *ANGPTL7*. The combined effect size estimate is summarized using inverse-variance method under the fixed effect model (Methods). %W (fixed) column indicates the relative weights used in the fixed effect model. The bottom right cell indicates the P-value of combined effect size model.

| Variant                   | SD (IOP) | 95% CI             | %W(fixed)                      |
|---------------------------|----------|--------------------|--------------------------------|
| Gln175His                 | -0.2003  | [-0.2534; -0.1471] | 70.5                           |
| Arg177Ter                 | -0.2626  | [-0.5107; -0.0144] | 3.2                            |
| Arg140His                 | -0.1555  | [-0.2502; -0.0607] | 22.1                           |
| Gln136Arg                 | -0.0380  | [-0.2564; 0.1804]  | 4.2                            |
| <b>Fixed effect model</b> | -0.1856  | [-0.2302; -0.1410] | P-value: $3.4 \times 10^{-16}$ |

385 **Supplementary Table S4.** The combined effect size estimates of rare protein-altering variants. The estimates of effect size on unstandardized intraocular pressure measurements (IOP [mmHg]) and their 95% confidence interval (95% CI) are shown for the four protein-altering variants in *ANGPTL7*. The combined effect size estimate is summarized using inverse-variance method under the fixed effect model (Methods). %W (fixed) column indicates the relative weights used in the fixed effect model. The bottom right cell indicates the P-value of combined effect size model.

| Variant                   | IOP (mmHg) | 95% CI             | %W(fixed)                      |
|---------------------------|------------|--------------------|--------------------------------|
| Gln175His                 | -0.7430    | [-0.9547; -0.5314] | 70.5                           |
| Arg177Ter                 | -0.9444    | [-1.9334; 0.0445]  | 3.2                            |
| Arg140His                 | -0.4816    | [-0.8593; -0.1039] | 22.1                           |
| Gln136Arg                 | -0.2078    | [-1.0785; 0.6630]  | 4.2                            |
| <b>Fixed effect model</b> | -0.6694    | [-0.8471; -0.4917] | P-value: $1.6 \times 10^{-13}$ |



390 **Supplementary Table S5:** Glaucoma definitions in FinnGen. ICD-codes are used in the Finnish hospital discharge and cause-of-death registries. ATC-codes are used in the Social Insurance Institution prescription drug purchase registry. All endpoint definitions in the FinnGen phenome-wide association analysis are available online (<https://www.finnngen.fi/fi/node/68>).

| Phenotype name                                                          | ICD-10           | ICD-9                   | ICD-8            | ICD-8 exclude | ATC (drug purchases) |
|-------------------------------------------------------------------------|------------------|-------------------------|------------------|---------------|----------------------|
| Glaucoma (broad definition, combination of all the subphenotypes below) | Any of the below | Any of the below        | Any of the below |               | S01EA                |
| Glaucoma suspect                                                        | H40.0            | 365.0                   | 375.97           |               |                      |
| Primary open-angle glaucoma                                             | H40.1            | 365.1                   | 375.1[0-3]       | 375.11        |                      |
| Primary angle-closure glaucoma                                          | H40.2            | 365.2                   | 375.00 375.11    |               |                      |
| Glaucoma secondary to eye trauma                                        | H40.3            | 365.6E                  |                  |               |                      |
| Glaucoma secondary to eye inflammation                                  | H40.4            | 365.6F 365.6B           | 364.01           |               |                      |
| Glaucoma secondary to other eye disorders                               | H40.5            | 365.5 365.6A            |                  |               |                      |
| Glaucoma secondary to drugs                                             | H40.6            | 365.3A                  |                  |               |                      |
| Other and unspecified glaucoma                                          | H40.[8-9]        | 365.6X 365.6C 365.[8-9] | 375.2 375.9      | 375.97        |                      |
| Glaucoma in diseases classified elsewhere                               | H42              | 365.4A                  |                  |               |                      |
| Use of antiglaucoma preparations and miotics                            |                  |                         |                  |               | S01EA                |

**Supplementary Table S6.** FinnGen summary of *MYOC* p.Gln168Ter and *ANGPTL7* p.Arg220Cys carriers in primary open glaucoma cases.

395 Percentage of POA Glaucoma by genotype:

ANGPTL7  
wt . R220C+  
MYOC- 2.0% . 1.3%  
MYOC+ 7.7% . 1.4%

400 **Supplementary Table S7.** *ANGPTL7* protein-altering variant association with reproductive  
 fitness, (A) the number of live births and (B) the number of children fathered. Variant includes  
 chromosome, position, reference, and alternate allele (hg19). rsID - the rs identifier of the  
 genetic variant. HGVS<sub>p</sub> - the HGVS protein sequence name. MAF - the minor allele frequency  
 405 in UK Biobank British population. Beta - estimated regression coefficient with 95% confidence  
 intervals. P - p-value of association.

### A. Number of live births

| Variant        | rsID        | HGVS <sub>p</sub> | MAF    | Dosage  | Beta [95% CI]           | P     |
|----------------|-------------|-------------------|--------|---------|-------------------------|-------|
| 1:11252357:A:G | rs200058074 | p.Gln136Arg       | .054 % | Gln/Arg | 0.089 [-0.064, 0.24]    | 0.26  |
| 1:11252369:G:A | rs28991002  | p.Arg140His       | .25 %  | Arg/His | 0.29 [-1.9, 2.5]        | 0.80  |
| 1:11253684:G:T | rs28991009  | p.Gln175His       | .81 %  | Gln/His | -0.0076 [-0.050, 0.035] | 0.72  |
|                |             |                   |        | His/His | 0.23 [-0.48, 0.93]      | 0.52  |
| 1:11253688:C:T | rs143435072 | p.Arg177Ter       | .041 % | Arg/Ter | 0.2 [0.021, 0.38]       | 0.029 |

### B. Number of children fathered

| Variant        | rsID        | HGVS <sub>p</sub> | MAF    | Dosage  | Beta [95% CI]           | P    |
|----------------|-------------|-------------------|--------|---------|-------------------------|------|
| 1:11252357:A:G | rs200058074 | p.Gln136Arg       | .054 % | Gln/Arg | 0.0064 [-0.19, 0.21]    | 0.95 |
| 1:11252369:G:A | rs28991002  | p.Arg140His       | .25 %  | Arg/His | 0.0030 [-0.081, 0.087]  | 0.94 |
| 1:11253684:G:T | rs28991009  | p.Gln175His       | .81 %  | Gln/His | -0.0052 [-0.054, 0.044] | 0.83 |
|                |             |                   |        | His/His | 0.41 [-0.17, 0.98]      | 0.16 |
| 1:11253688:C:T | rs143435072 | p.Arg177Ter       | .041 % | Arg/Ter | -0.052 [-0.27, 0.17]    | 0.64 |

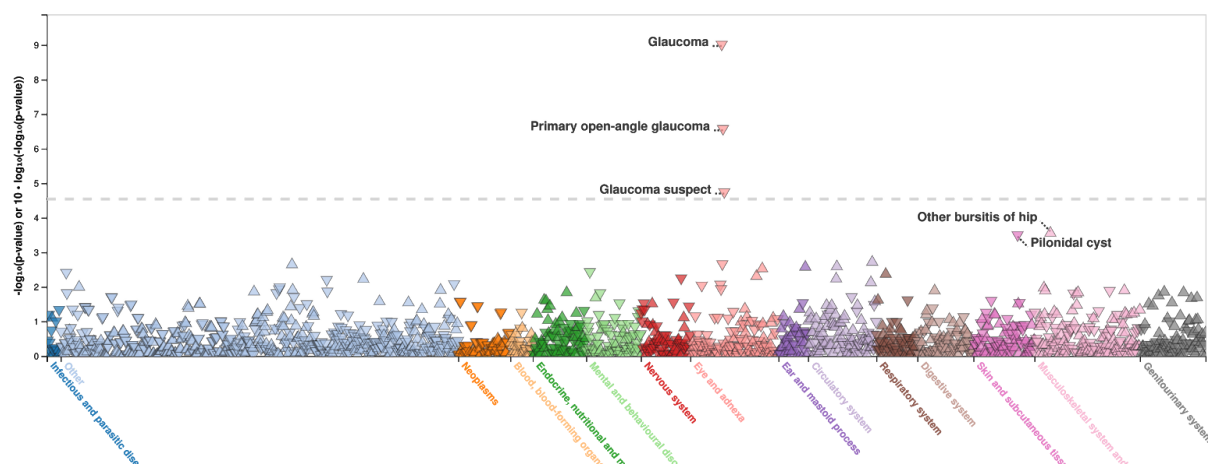

**Supplementary Figure S5:** Phenome-wide association analysis of p.R220C in FinnGen.

$-\log_{10}(P\text{-value})$  is displayed in y-axis. Disease endpoints grouped by disease categories are displayed on the x-axis. Highlighted associations with  $P < 0.001$  are shown.

410

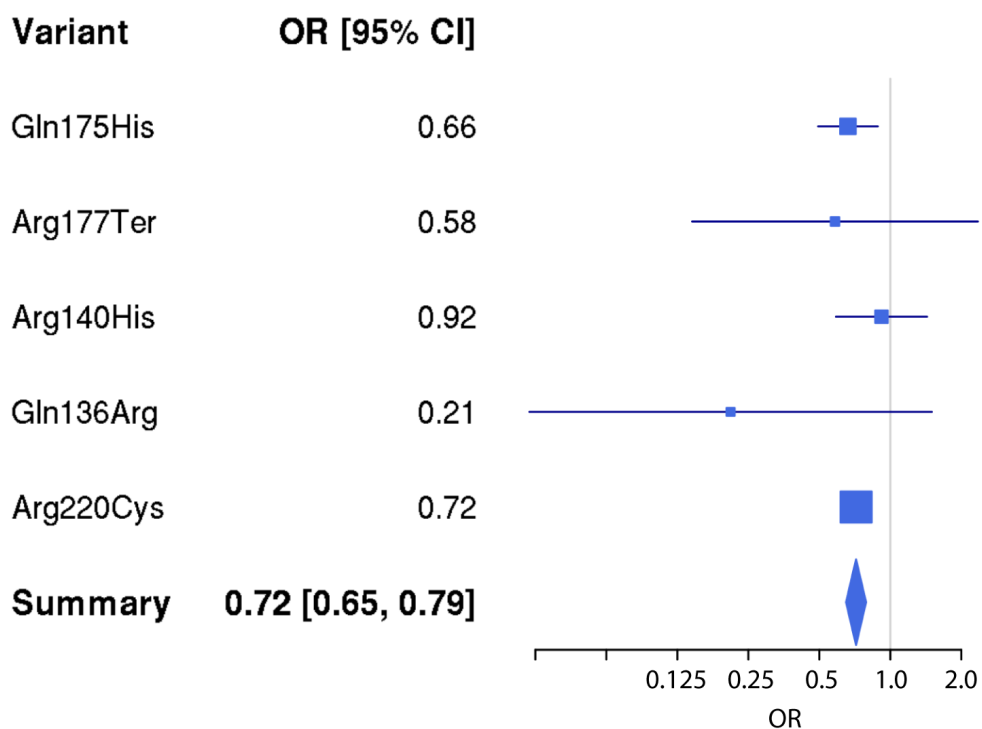

**Supplementary Figure S6:** The combined effect size estimates of rare protein-altering variants. The estimates of effect size (odds ratio, OR) on glaucoma is shown in log scale for the five protein-altering variants in *ANGPTL7*. The combined effect size estimate is summarized using inverse-variance method under the fixed effect model and 95% confidence intervals are shown (Methods).

415

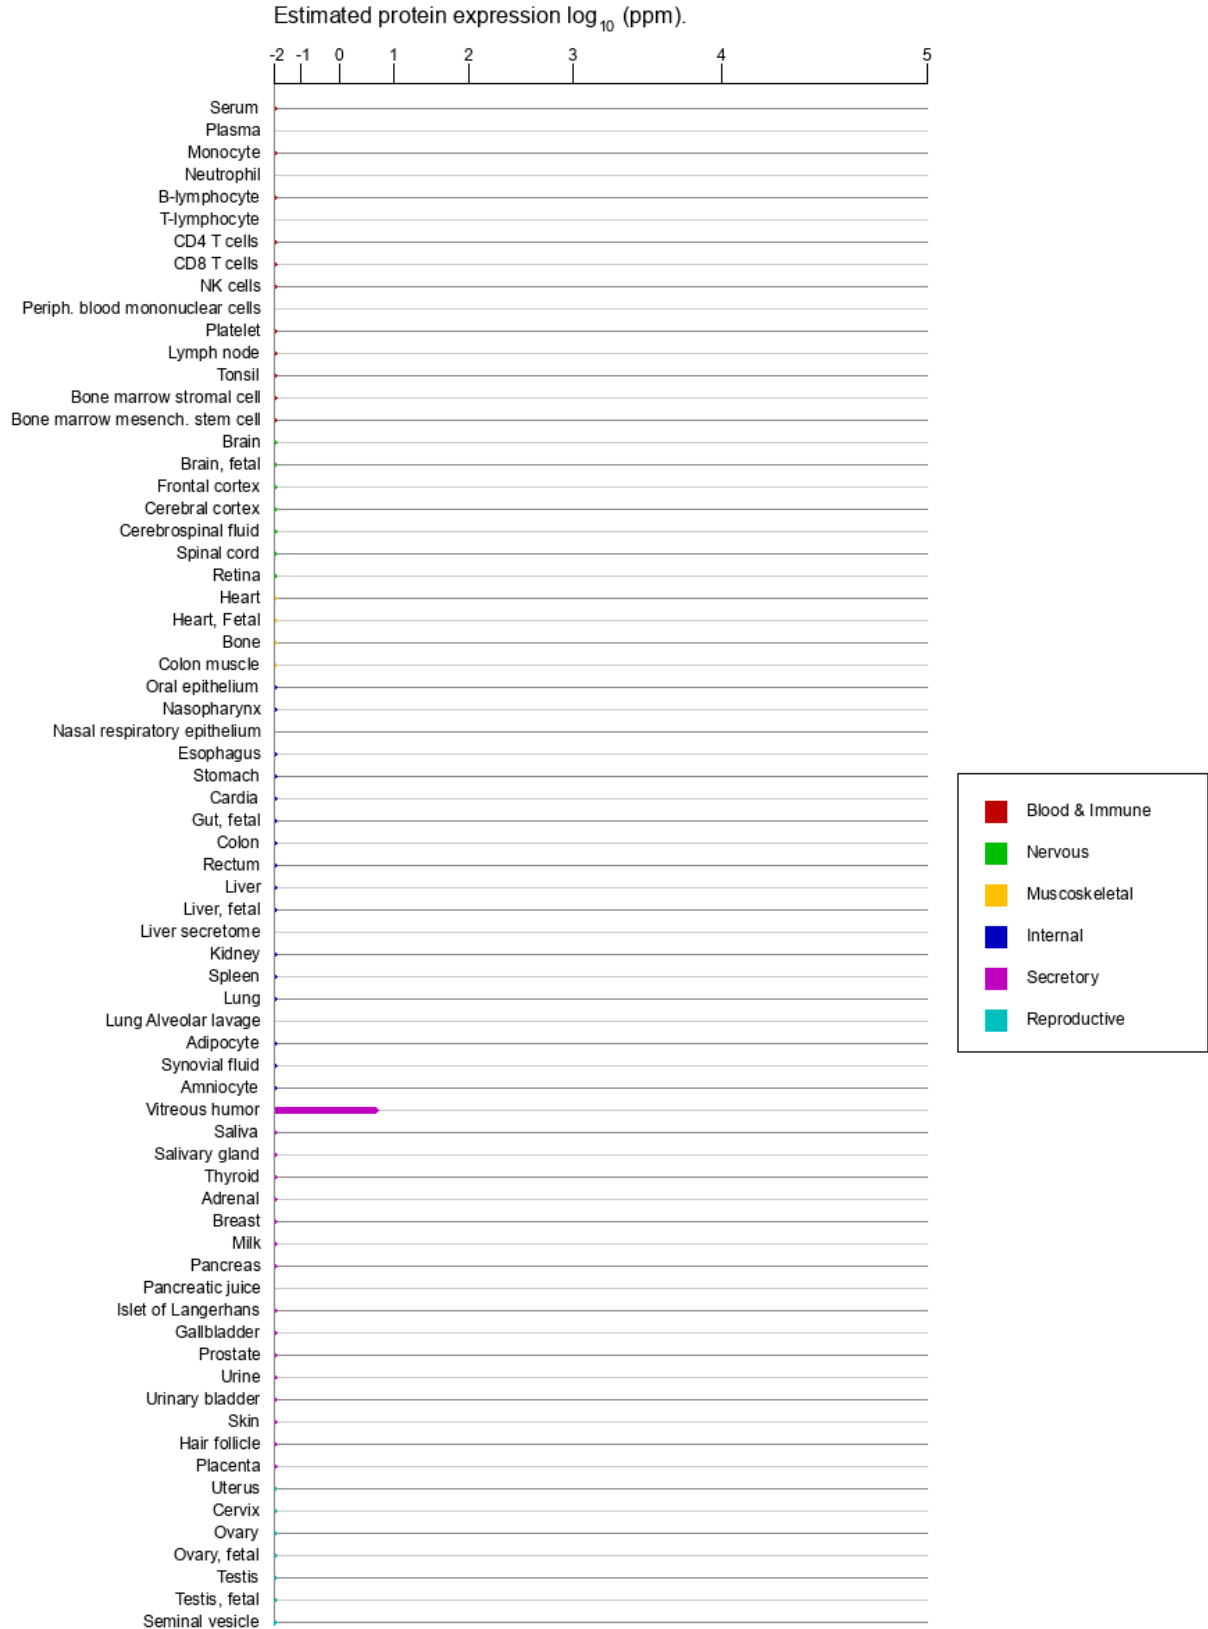

**Supplementary Figure S7:** Protein expression in normal tissues and cell lines from ProteomicsDB and MOPED for ANGPTL7

## Supplementary Note

### FinnGen

420 FinnGen consists of the following people:

#### Steering Committee

Aarno Palotie            University of Helsinki / FIMM  
Mark Daly                University of Helsinki / FIMM

#### Pharma

425 Howard Jacob            Abbvie  
Athena Matakidou        Astra Zeneca  
Heiko Runz                Biogen  
Sally John                 Biogen  
Robert Plenge             Celgene  
430 Julie Hunkapiller        Genentech  
Meg Ehm                    GSK  
Dawn Waterworth         GSK  
Caroline Fox               Merck  
Anders Malarstig         Pfizer  
435 Kathy Klinger            Sanofi  
Kathy Call                 Sanofi

#### UH & Biobanks

Tomi Mäkelä               University of Helsinki / FIMM  
Jaakko Kaprio             University of Helsinki / FIMM  
440 Petri Virolainen         Auria BB / Univ. of Turku /VSSHP  
Kari Pulkki                Auria BB / Univ. of Turku /VSSHP  
Terhi Kilpi                 THL Biobank (BB) / THL  
Markus Perola             THL Biobank (BB) / THL  
Jukka Partanen            Finnish Red Cross Blood Service/FHRB  
445 Anne Pitkäranta         HUS/Univ Hosp Districts  
Riitta Kaarteenaho        Borealis BB/Univ. of Oulu/PPSHP  
Seppo Vainio               Borealis BB/Univ. of Oulu/PPSHP  
Kimmo Savinainen        Tampere BB/Univ Tampere/PSHP  
Veli-Matti Kosma         Eastern Finland BB/UEF/PSSHP  
450 Urho Kujala               Central Finland BB /UJy/KSSHP

## Scientific Committee

### Pharma

|     |                      |                                      |
|-----|----------------------|--------------------------------------|
|     | Jeff Waring          | Abbvie                               |
|     | Bridget Riley-Gillis | AbbVie                               |
| 455 | Athena Matakidou     | Astra Zeneca                         |
|     | Heiko Runz           | Biogen                               |
|     | Jimmy Liu            | Biogen                               |
|     | Shameek Biswas       | Celgene                              |
|     | Julie Hunkapiller    | Genentech                            |
| 460 | Dawn Waterworth      | GSK                                  |
|     | Meg Ehm              | GSK                                  |
|     | Josh Hoffman         | GSK                                  |
|     | Dorothee Diogo       | Merck                                |
|     | Caroline Fox         | Merck                                |
| 465 | Anders Malarstig     | Pfizer                               |
|     | Catherine Marshall   | Pfizer                               |
|     | Xinli Hu             | Pfizer                               |
|     | Kathy Call           | Sanofi                               |
|     | Kathy Klinger        | Sanofi                               |
| 470 |                      |                                      |
|     | UH & Biobanks        |                                      |
|     | Samuli Ripatti       | University of Helsinki / FIMM        |
|     | Johanna Schleutker   | Auria BB / Univ. of Turku /VSSHP     |
|     | Markus Perola        | THL Biobank (BB) / THL               |
|     | Tiina Wahlfors       | Finnish Red Cross Blood Service/FHRB |
| 475 | Olli Carpen          | HUS/Univ Hosp Districts              |
|     | Johanna Myllyharju   | Borealis BB/Univ. of Oulu/PPSHP      |
|     | Johannes Kettunen    | Borealis BB/Univ. of Oulu/PPSHP      |
|     | Reijo Laaksonen      | Tampere BB/Univ Tampere/PSHP         |
|     | Arto Mannermaa       | Eastern Finland BB/UEF/PSSHP         |
| 480 | Juha Paloneva        | Central Finland BB /UJy/KSSHP        |
|     | Urho Kujala          | Central Finland BB /UJy/KSSHP        |

### Clinical Groups

#### Neurology Group

|     |                   |              |
|-----|-------------------|--------------|
|     | Hilkka Soininen   | LEAD: Kuopio |
| 485 | Valtteri Julkunen | Kuopio       |



|     |                     |           |
|-----|---------------------|-----------|
|     | Anne Remes          | Oulu      |
|     | Reetta Kälviäinen   | Kuopio    |
|     | Mikko Hiltunen      | Kuopio    |
|     | Jukka Peltola       | Tampere   |
| 490 | Pentti Tienari      | Helsinki  |
|     | Juha Rinne          | Turku     |
|     | Adam Ziemann        | AbbVie    |
|     | Jeffrey Waring      | AbbVie    |
|     | Sahar Esmaeeli      | AbbVie    |
| 495 | Nizar Smaoui        | AbbVie    |
|     | Anne Lehtonen       | AbbVie    |
|     | Susan Eaton         | Biogen    |
|     | Heiko Runz          | Biogen    |
|     | Sanni Lahdenperä    | Biogen    |
| 500 | Janet van Adelsberg | Celgene   |
|     | Shameek Biswas      | Celgene   |
|     | John Michon         | Genentech |
|     | Geoff Kerchner      | Genentech |
|     | Julie Hunkapiller   | Genentech |
| 505 | Natalie Bowers      | Genentech |
|     | Edmond Teng         | Genentech |
|     | John Eicher         | Merck     |
|     | Vinay Mehta         | Merck     |
|     | Padhraig Gormley    | Merck     |
| 510 | Kari Linden         | Pfizer    |
|     | Christopher Whelan  | Pfizer    |
|     | Fanli Xu            | GSK       |
|     | David Pulford       | GSK       |

#### Gastroenterology Group

|     |                       |          |
|-----|-----------------------|----------|
| 515 | Martti Färkkilä LEAD: | Helsinki |
|     | Sampsa Pikkarainen    | HUS      |
|     | Airi Jussila          | Tampere  |
|     | Timo Blomster         | Oulu     |
|     | Mikko Kiviniemi       | Kuopio   |
| 520 | Markku Voutilainen    | Turku    |
|     | Bob Georgantas        | AbbVie   |
|     | Graham Heap           | AbbVie   |
|     | Jeffrey Waring        | AbbVie   |
|     | Nizar Smaoui          | AbbVie   |
| 525 | Fedik Rahimov         | AbbVie   |
|     | Anne Lehtonen         | AbbVie   |

|                    |                         |                               |
|--------------------|-------------------------|-------------------------------|
|                    | Keith Usiskin           | Celgene                       |
|                    | Tim Lu                  | Genentech                     |
|                    | Natalie Bowers          | Genentech                     |
| 530                | Danny Oh                | Genentech                     |
|                    | John Michon             | Genentech                     |
|                    | Vinay Mehta             | Merck                         |
|                    | Dermot Reilly           | Merck                         |
|                    | Kirsi Kalpala           | Pfizer                        |
| 535                | Melissa Miller          | Pfizer                        |
|                    | Xinli Hu                | Pfizer                        |
|                    | Linda McCarthy          | GSK                           |
| Rheumatology Group |                         |                               |
|                    | Kari Eklund             | LEAD:Helsinki                 |
| 540                | Antti Palomäki          | Turku                         |
|                    | Pia Isomaki             | Tampere                       |
|                    | Laura Pirilä            | Turku                         |
|                    | Oili Kaipainen-Seppänen | Kuopio                        |
|                    | Johanna Huhtakangas     | Oulu                          |
| 545                | Bob Georgantas          | AbbVie                        |
|                    | Jeffrey Waring          | AbbVie                        |
|                    | Fedik Rahimov           | AbbVie                        |
|                    | Apinya Lertratanakul    | AbbVie                        |
|                    | Nizar Smaoui            | AbbVie                        |
| 550                | Anne Lehtonen           | AbbVie                        |
|                    | David Close             | AstraZeneca                   |
|                    | Marla Hochfeld          | Celgene                       |
|                    | Natalie Bowers          | Genentech                     |
|                    | John Michon             | Genentech                     |
| 555                | Dorothee Diogo          | Merck                         |
|                    | Vinay Mehta             | Merck                         |
|                    | Kirsi Kalpala           | Pfizer                        |
|                    | Nan Bing                | Pfizer                        |
|                    | Xinli Hu                | Pfizer                        |
| 560                | Jorge Esparza Gordillo  | GSK                           |
|                    | Nina Mars               | University of Helsinki / FIMM |

#### Pulmonology Group

|     |                    |              |
|-----|--------------------|--------------|
|     | Tarja Laitinen     | LEAD:Tampere |
|     | Margit Pelkonen    | Kuopio       |
| 565 | Paula Kauppi       | Helsinki     |
|     | Hannu Kankaanranta | Tampere      |

|     |                  |             |
|-----|------------------|-------------|
|     | Terttu Harju     | Oulu        |
|     | Nizar Smaoui     | AbbVie      |
|     | David Close      | AstraZeneca |
| 570 | Steven Greenberg | Celgene     |
|     | Hubert Chen      | Genentech   |
|     | Natalie Bowers   | Genentech   |
|     | John Michon      | Genentech   |
|     | Vinay Mehta      | Merck       |
| 575 | Jo Betts         | GSK         |
|     | Soumitra Ghosh   | GSK         |

#### Cardiometabolic Diseases Group

|     |                       |                             |
|-----|-----------------------|-----------------------------|
|     | Veikko Salomaa        | Lead: THL                   |
|     | Teemu Niiranen        | THL                         |
| 580 | Markus Juonala        | Turku                       |
|     | Kaj Metsärinne        | Turku                       |
|     | Mika Kähönen          | Tampere                     |
|     | Juhani Juntila        | Oulu                        |
|     | Markku Laakso         | Kuopio                      |
| 585 | Jussi Pihlajamäki     | Kuopio                      |
|     | Juha Sinisalo         | Helsinki                    |
|     | Marja-Riitta Taskinen | Helsinki                    |
|     | Tiinamaija Tuomi      | Helsinki                    |
|     | Jari Laukkanen        | Keski-Suomen Keskussairaala |
| 590 | Ben Challis           | AstraZeneca                 |
|     | Keith Usiskin         | Celgene                     |
|     | Andrew Peterson       | Genentech                   |
|     | Julie Hunkapiller     | Genentech                   |
|     | Natalie Bowers        | Genentech                   |
| 595 | John Michon           | Genentech                   |
|     | Dorothee Diogo        | Merck                       |
|     | Dermot Reilly         | Merck                       |
|     | Audrey Chu            | Merck                       |
|     | Vinay Mehta           | Merck                       |
| 600 | Jaakko Parkkinen      | Pfizer                      |
|     | Melissa Miller        | Pfizer                      |
|     | Anthony Muslin        | Sanofi                      |
|     | Dawn Waterworth       | GSK                         |

#### Oncology Group

|     |                |                |
|-----|----------------|----------------|
| 605 | Heikki Joensuu | Lead: Helsinki |
|     | Tuomo Meretoja | Helsinki       |

|     |                           |                |
|-----|---------------------------|----------------|
|     | Olli Carpen               | Helsinki       |
|     | Lauri Aaltonen            | Helsinki       |
|     | Annika Auranen            | Tampere        |
| 610 | Peeter Karihtala          | Oulu           |
|     | Saila Kauppila            | Oulu           |
|     | Päivi Auvinen             | Kuopio         |
|     | Klaus Elenius             | Turku          |
|     | Relja Popovic             | AbbVie         |
| 615 | Jeffrey Waring            | AbbVie         |
|     | Bridget Riley-Gillis      | AbbVie         |
|     | Anne Lehtonen             | AbbVie         |
|     | Athena Matakidou          | AstraZeneca    |
|     | Jennifer Schutzman        | Genentech      |
| 620 | Julie Hunkapiller         | Genentech      |
|     | Natalie Bowers            | Genentech      |
|     | John Michon               | Genentech      |
|     | Vinay Mehta               | Merck          |
|     | Andrey Loboda             | Merck          |
| 625 | Aparna Chhibber           | Merck          |
|     | Heli Lehtonen             | Pfizer         |
|     | Stefan McDonough          | Pfizer         |
|     | Marika Crohns             | Sanofi         |
|     | Diptee Kulkarni           | GSK            |
| 630 | Ophthalmology Group       |                |
|     | Kai Kaarniranta           | Lead: Kuopio   |
|     | Joni Turunen              | HUS/ Secretary |
|     | Terhi Ollila              | HUS            |
|     | Sanna Seitsonen           | HUS            |
| 635 | Hannu Uusitalo            | Tampere        |
|     | Vesa Aaltonen             | Turku          |
|     | Hannele Uusitalo-Järvinen | PSHP           |
|     | Marja Luodonpää           | Oulu           |
|     | Nina Hautala              | Oulu           |
| 640 | Heiko Runz                | Biogen         |
|     | Erich Strauss             | Genentech      |
|     | Natalie Bowers            | Genentech      |
|     | Hao Chen                  | Genentech      |
|     | John Michon               | Genentech      |
| 645 | Anna Podgornaia           | Merck          |
|     | Vinay Mehta               | Merck          |
|     | Dorothee Diogo            | Merck          |

Joshua Hoffman GSK

### Dermatology Group

650 Kaisa Tasanen Oulu  
Laura Huilaja Oulu  
Katariina Hannula-Jouppi HUS  
Teea Salmi Tampere  
Sirku Peltonen Turku  
655 Leena Koulu Turku  
Ilkka Harvima Kuopio  
Kirsi Kalpala Pfizer  
Ying Wu Pfizer  
David Choy Genentech  
660 John Michon Genentech  
Nizar Smaoui AbbVie  
Fedik Rahimov AbbVie  
Anne Lehtonen AbbVie  
Dawn Waterworth GSK

665

### FinnGen Teams

#### Administration Team

Anu Jalanko University of Helsinki / FIMM  
Risto Kajanne University of Helsinki / FIMM  
Ulrike Lyhs University of Helsinki / FIMM

670

#### Communication

Mari Kaunisto University of Helsinki / FIMM

#### Analysis Team

Justin Wade Davis Abbvie  
Bridget Riley-Gillis Abbvie  
675 Danjuma Quarless Abbvie  
Slavé Petrovski Astra Zeneca  
Jimmy Liu Biogen  
Chia-Yen Chen Biogen  
Paola Bronson Biogen  
680 Robert Yang Celgene  
Joseph Maranville Celgene  
Shameek Biswas Celgene  
Diana Chang Genentech

|     |                             |                                                |
|-----|-----------------------------|------------------------------------------------|
|     | Julie Hunkapiller           | Genentech                                      |
| 685 | Tushar Bhangale             | Genentech                                      |
|     | Natalie Bowers              | Genentech                                      |
|     | Dorothee Diogo              | Merck                                          |
|     | Emily Holzinger             | Merck                                          |
|     | Padhraig Gormley            | Merck                                          |
| 690 | Xulong Wang                 | Merck                                          |
|     | Xing Chen                   | Pfizer                                         |
|     | Åsa Hedman                  | Pfizer                                         |
|     | Joshua Hoffman              | GSK                                            |
|     | Clarence Wang               | Sanofi                                         |
| 695 | Ethan Xu                    | Sanofi                                         |
|     | Franck Auge                 | Sanofi                                         |
|     | Clement Chatelain           | Sanofi                                         |
|     | Mitja Kurki                 | University of Helsinki / FIMM/ Broad Institute |
|     | Samuli Ripatti              | University of Helsinki / FIMM                  |
| 700 | Mark Daly                   | University of Helsinki / FIMM                  |
|     | Juha Karjalainen            | University of Helsinki / FIMM/ Broad Institute |
|     | Aki Havulinna               | University of Helsinki / FIMM                  |
|     | Anu Jalanko                 | University of Helsinki / FIMM                  |
|     | Kimmo Palin                 | University of Helsinki                         |
| 705 | Priit Palta                 | University of Helsinki / FIMM                  |
|     | Pietro della Briotta Parolo | University of Helsinki / FIMM                  |
|     | Wei Zhou                    | Broad Institute                                |
|     | Susanna Lemmelä             | University of Helsinki / FIMM                  |
|     | Manuel Rivas                | University of Stanford                         |
| 710 | Jarmo Harju                 | University of Helsinki / FIMM                  |
|     | Aarno Palotie               | University of Helsinki / FIMM                  |
|     | Arto Lehisto                | University of Helsinki / FIMM                  |
|     | Andrea Ganna                | University of Helsinki / FIMM                  |
|     | Vincent Llorens             | University of Helsinki / FIMM                  |
| 715 | Antti Karlsson              | Auria BB / Univ. of Turku /VSSHP               |
|     | Kati Kristiansson           | THL BB / THL                                   |
|     | Mikko Arvas                 | Finnish Red Cross Blood Service BB /FHRB       |
|     | Kati Hyvärinen              | Finnish Red Cross Blood Service BB /FHRB       |
|     | Jarmo Ritari                | Finnish Red Cross Blood Service BB /FHRB       |
| 720 | Tiina Wahlfors              | Finnish Red Cross Blood Service BB /FHRB       |
|     | Miika Koskinen              | Helsinki BB/HUS/Univ Hosp Districts            |
|     | Olli Carpen                 | Helsinki BB/HUS/Univ Hosp Districts            |
|     | Johannes Kettunen           | Borealis BB/Univ. of Oulu/PPSHP                |
|     | Katri Pylkäs                | Borealis BB/Univ. of Oulu/PPSHP                |
| 725 | Marita Kalaoja              | Borealis BB/Univ. of Oulu/PPSHP                |
|     | Minna Karjalainen           | Borealis BB/Univ. of Oulu/PPSHP                |

730 Tuomo Mantere Borealis BB/Univ. of Oulu/PPSHP  
Eeva Kangasniemi Tampere BB/Univ Tampere/PSHP  
Sami Heikkinen Eastern Finland BB/UEF/PSSHP  
Arto Mannermaa Eastern Finland BB/UEF/PSSHP  
Eija Laakkonen Central Finland BB /UJy/KSSHP  
Juha Kononen Central Finland BB /UJy/KSSHP

#### Sample Collection Coordination

735 Anu Loukola Helsinki BB/HUS/Univ Hosp Districts

#### Sample Logistics

Päivi Laiho THL BB / THL  
Tuuli Sistonen THL BB / THL  
Essi Kaiharju THL BB / THL  
Markku Laukkanen THL BB / THL  
740 Elina Järvensivu THL BB / THL  
Sini Lähteenmäki THL BB / THL  
Lotta Männikkö THL BB / THL  
Regis Wong THL BB / THL

#### Registry Data Operations

745 Kati Kristiansson THL BB / THL  
Hannele Mattsson THL BB / THL  
Susanna Lemmelä University of Helsinki / FIMM  
Tero Hiekkalinna THL BB / THL  
Manuel González Jiménez THL BB / THL

750

#### Genotyping

Kati Donner University of Helsinki / FIMM

#### Sequencing Informatics

Priit Palta University of Helsinki / FIMM  
Kalle Pärn University of Helsinki / FIMM  
755 Javier Nunez-Fontarnau University of Helsinki / FIMM

#### Data Management and IT Infrastructure

Jarmo Harju University of Helsinki / FIMM  
Elina Kilpeläinen University of Helsinki / FIMM  
Timo P. Sipilä University of Helsinki / FIMM  
760 Georg Brein University of Helsinki / FIMM  
Alexander Dada University of Helsinki / FIMM

Ghazal Awaisa University of Helsinki / FIMM  
Anastasia Shcherban University of Helsinki / FIMM  
Tuomas Sipilä University of Helsinki / FIMM

765

#### Clinical Endpoint Development

Hannele Laivuori University of Helsinki / FIMM  
Aki Havulinna University of Helsinki / FIMM  
Susanna Lemmelä University of Helsinki / FIMM  
Tuomo Kiiskinen University of Helsinki / FIMM

770

#### Trajectory Team

Tarja Laitinen Tampere University Hospital  
Harri Siirtola University of Tampere  
Javier Gracia Tabuenca University of Tampere

#### Biobank Directors

775

Lila Kallio Auria Biobank  
Sirpa Soini THL Biobank  
Jukka Partanen Blood Service Biobank  
Kimmo Pitkänen Helsinki Biobank  
Seppo Vainio Northern Finland Biobank Borealis  
780 Kimmo Savinainen Tampere Biobank  
Veli-Matti Kosma Biobank of Eastern Finland  
Teijo Kuopio Central Finland Biobank
